# Cathepsin D deficiency underlies congenital human neuronal ceroid-lipofuscinosis

Eija Siintola,<sup>1,\*</sup> Sanna Partanen,<sup>2,\*</sup> Petter Strömme,<sup>4</sup> Aleksi Haapanen,<sup>2</sup> Matti Haltia,<sup>3</sup> Jan Maehlen,<sup>5</sup> Anna-Elina Lehesjoki<sup>1</sup> and Jaana Tyynelä<sup>2</sup>

<sup>1</sup>Folkhälsan Institute of Genetics, Department of Medical Genetics and Neuroscience Center, <sup>2</sup>Institute of Biomedicine/Biochemistry and Neuroscience Research Program, Biomedicum Helsinki, <sup>3</sup>Department of Pathology, Haartman Institute, University of Helsinki, Helsinki, Finland, <sup>4</sup>Department of Pediatrics and <sup>5</sup>Department of Pathology, Ullevål University Hospital, Oslo, Norway

\*These authors contributed equally to this work.

Correspondence to: Dr Jaana Tyynelä, Institute of Biomedicine/Biochemistry, Haartmaninkatu 8, 00014 University of Helsinki, Helsinki, Finland  
E-mail: jaana.tyynela@helsinki.fi

**Congenital neuronal ceroid-lipofuscinosis (NCL) is a devastating inherited neurodegenerative disorder of unknown metabolic basis. Eight patients with this rare disorder, all with similar clinical and neuropathological findings, have been reported, and here we describe two further patients. Previously, we showed that a mutation in the cathepsin D gene causes congenital NCL in sheep. On the basis of the neuropathological and ultrastructural similarities between the sheep and patients affected with congenital NCL, we screened the cathepsin D gene for mutations in a patient of Pakistani origin. We identified a nucleotide duplication, c.764dupA, in the cathepsin D gene in homozygous form in the patient, and in heterozygous form in his father. This duplication is likely to be disease-causing, as it creates a premature stop codon, predicting a truncation of the protein. When transiently expressed in cell cultures, the mutant protein was enzymatically inactive, but stable. In paraffin-embedded brain tissue samples of two affected siblings of the Pakistani patient, cathepsin D was absent, suggesting rapid degradation of the c.764dupA mutant cathepsin D at mRNA or protein level *in vivo*. Further, we were able to confirm lack of cathepsin D in the brain tissue of yet another, unrelated, patient of English origin with congenital NCL. On the basis of the present data, and the nearly identical clinical and/or pathological phenotype of the other reported cases of congenital NCL, it is reasonable to suggest that cathepsin D deficiency caused by mutations in the corresponding gene may underlie all cases of congenital NCL. The present observations also suggest that cathepsin D deficiency should be considered as a possible diagnosis in microcephalic neonates, who present with seizures at or before birth.**

**Keywords:** lysosomal storage disorder; molecular biology; mutation; neuronal degeneration; newborn infant

**Abbreviations:** BHK = baby hamster kidney; CTSD = cathepsin D; GFAP = glial fibrillary acidic protein; NCL = neuronal ceroid-lipofuscinosis

Received February 29, 2006. Revised March 29, 2006. Accepted March 30, 2006. Advance Access publication May 2, 2006

## Introduction

Congenital neuronal ceroid-lipofuscinosis (congenital NCL, earlier called congenital amaurotic idiocy) is a devastating storage disorder of unknown metabolic basis. This disease represents the earliest-onset and the most aggressive form of the NCL, leading to extreme brain atrophy and death soon after birth (for reviews, see Barohn *et al.*, 1992; Kohlschütter and Lake, 1999). The NCLs are a genetically heterogeneous group of lysosomal storage disorders characterized by progressive neurodegeneration, and they

collectively constitute the most common cause for children's progressive encephalopathies (for reviews, see Haltia, 2003; Tyynelä, 2005). Congenital NCL was first described in 1941 (Norman and Wood, 1941), and since then seven further cases of congenital NCL have been reported, including both male and female offspring of both consanguineous and non-consanguineous marriages (Brown *et al.*, 1954; Sandbank, 1968; Humphreys *et al.*, 1985; Garborg *et al.*, 1987; Barohn *et al.*, 1992). In two of these families, there

was more than one affected child with identical clinical history and/or neuropathological findings in a large family of otherwise healthy siblings and parents, and thus autosomal recessive inheritance has been considered likely (Brown *et al.*, 1954; Sandbank, 1968).

Congenital NCL presents clinically with post-natal respiratory insufficiency and status epilepticus, and death occurs within hours to weeks (Norman and Wood, 1941; Brown *et al.*, 1954; Sandbank, 1968; Humphreys *et al.*, 1985; Garborg *et al.*, 1987; Barohn *et al.*, 1992). The patients are microcephalic, with extremely small brains, weighing only 65–200 g instead of the normal 385 g after 40 weeks gestation. Typically, there is a subtotal loss of neurons in the cerebral cortex, as well as generalized activation of astrocytes and microglia. The white matter appears to lack myelin, and the cerebellum is extremely atrophic (Sandbank, 1968; Humphreys *et al.*, 1985; Garborg *et al.*, 1987; Barohn *et al.*, 1992). Most cells of the central nervous system are loaded with autofluorescent storage bodies, showing a granular ultrastructure, the so-called granular osmiophilic deposits (GRODs; Humphreys *et al.*, 1985; Garborg *et al.*, 1987; Barohn *et al.*, 1992).

Previously, an active site mutation (corresponding to human p.Asp295Asn) in the ovine cathepsin D (*CTSD*) gene was identified as a cause of congenital NCL in sheep (Tyynelä *et al.*, 2000). Newborn lambs with congenital NCL are severely affected at birth and die within a few days (Järplid and Haltia, 1993; Tyynelä *et al.*, 2000). Neuropathological findings in these sheep closely resemble those reported in patients with congenital NCL, including not only the extreme neuronal loss and glial activation but also the presence of storage deposits with granular ultrastructure (Humphreys *et al.* 1985; Garborg *et al.*, 1987; Barohn *et al.*, 1992; Tyynelä *et al.*, 2000). The storage deposits in affected sheep show accumulation of sphingolipid activator proteins, but not of mitochondrial ATP synthase subunit c (Tyynelä *et al.*, 2000). Recently, another naturally occurring *CTSD* deficiency was reported in American bulldogs with a late-onset, fatal NCL (Awano *et al.*, 2005). The underlying mutation (p.Met199Ile) results in relatively high residual enzyme activity (Awano *et al.*, 2005). In addition, targeted disruption of the *Ctsd* gene results in an early-onset NCL phenotype and progressive neurodegeneration in mice and *Drosophila* (Saftig *et al.*, 1995; Koike *et al.*, 2000; Myllykangas *et al.*, 2005).

In the present work, we provide the first molecular explanation for human congenital NCL, showing that a mutation in the *CTSD* gene underlies the neurodegeneration in an infant of Pakistani origin with healthy parents. Moreover, we characterize the disease-associated mutant *CTSD* protein by transiently expressing it in baby hamster kidney (BHK) cells, and show the absence of *CTSD* protein and other abnormal immunohistological changes in the paraffin-embedded brain specimens of patients with congenital NCL.

## Material and methods

### Clinical history and patient tissues

Family A: The parents of the affected children were healthy first cousins of Pakistani origin. Of their seven children, three boys born in 1985 (Patient 1), 1989 (Patient 2) and 1999 (Patient 3) exhibited clinical and neuropathological findings consistent with congenital NCL, as previously reported in Patient 1 (Garborg *et al.*, 1987). Clinical data concerning foetal and post-natal development were retrieved from the medical charts. EDTA-blood samples were retrieved from Patient 3 and his healthy father after informed consent, and genomic DNA was extracted using standard techniques. Paraffin-embedded brain tissue samples of Patients 1 and 2 were obtained at routine autopsies for diagnostic purposes.

Family B: The mother of Patient 4 (born in 1982) was British, but no information is available concerning the nationality of the father. The clinical and neuropathological findings were consistent with congenital NCL reported by Humphreys *et al.* (1985). Paraffin-embedded tissue material from this case and controls was obtained in a routine autopsy for diagnostic purposes. The controls for the identified *CTSD* mutation consisted of 225 Caucasian (Centre d'Etude du Polymorphisme Humain, CEPH, and Finnish) individuals. An institutional review board of the Helsinki University Central Hospital approved the study.

### Mutation scanning in the *CTSD* gene

The nine exons, the exon–intron boundaries and at least 60 nucleotides of the exon-flanking non-coding regions in the *CTSD* gene (GenBank accession no. M11233) were screened for mutations by genomic sequencing. Polymerase chain reactions (PCRs) were performed using 50 ng of genomic DNA in a volume of 20 µl containing 1 × PCR buffer, 125 µM of dNTPs, 0.325 µM of each exon-flanking primer and 1 U of AmpliTaq Gold Polymerase (Applied Biosystems, Foster City, CA, USA). In addition, the reaction for exon 1 contained 10% dimethyl sulphoxide (Sigma-Aldrich, Saint Louis, MO, USA) and the reaction for exons 7 and 8 contained 0.5 M betaine (Sigma-Aldrich). Primer sequences are available from the authors on request. PCR conditions were as follows: 10 min at 94°C, followed by 35 cycles of denaturation at 94°C for 45 s, annealing at 58–64°C for 45 s and synthesis at 72°C for 45 s, and an extension at 72°C for 5 min. PCR products were visualized on 1% agarose gels, purified using enzymatic Exo/SAP treatment (USB Corporation, Cleveland, OH, USA) and sequenced using Big-Dye Terminator v3.1 Cycle Sequencing Kit and an ABI 3730 DNA Analyzer (Applied Biosystems). Sequences were analysed with Sequencher 4.5 software (Gene Codes Corporation, Ann Arbor, MI, USA). The identified mutation in the *CTSD* gene was screened in a panel of 550 control chromosomes by genomic sequencing.

### Construction of the expression plasmid and site-directed mutagenesis

The coding region of the human *CTSD* cDNA was digested from the IMAGE clone 3506977 (RZPD clone IRAUp969A1048D, RZPD, Berlin, Germany) with restriction enzymes *EcoRI* and *XhoI* (New England Biolabs, Ipswich, MA, USA) and ligated into the pcDNA3.1(+) expression vector (Invitrogen, Carlsbad, CA, USA) cleaved with the same enzymes. The insert was sequenced as described above. Two different mutations, c.764dupA and c.883G→A, corresponding to genetic defects causing the human and ovine congenital NCL, respectively, were introduced into the human wild-type pcDNA3.1(+)-*CTSD* construct sequence by

site-directed mutagenesis using the Quick Change Site-Directed Mutagenesis Kit (Stratagene, La Jolla, CA, USA). The primer sequences used in the mutagenesis are available from the authors on request. The mutation constructs were verified by sequencing as described above.

### Cell culture and transfections

BHK cells were seeded on 35-mm plates at a density of  $5 \times 10^5$  cells/well 24 h before transfection. Cells were cultured in EMEM (Sigma-Aldrich)/10% fetal calf serum without any antibiotics and transiently transfected with a mixture of 4 µg of each *CTSD* cDNA construct and 4 µl of Lipofectamine 2000 (Invitrogen, Carlsbad, CA, USA) in 0.4 ml of OPTIMEM I (Invitrogen, Grand Island, NY, USA). As controls, the cells were transfected with pcDNA3.1(+) vector or left non-transfected. After transfection, the cells were incubated at 37°C for 24 h before the media and cells were collected.

### Western blotting

After transfection, the proteins from the collected BHK cells were extracted by ultrasonication in phosphate-buffered saline (PBS)/0.5% sodium deoxycholate/0.05% Triton X-100/protease inhibitors (Complete, Roche, Mannheim, Germany). The samples were centrifuged at 20 000 g for 10 min and the supernatant's protein concentration was determined with a BCA protein quantification kit (Interchim, Montluçon, France). Aliquots of supernatants containing 5 µg of protein were separated in 12% sodium dodecyl sulphate-polyacrylamide gel electrophoresis (SDS-PAGE) and blotted onto polyvinylidene difluoride membrane (Millipore, Bedford, USA). After blocking with 4% bovine serum albumin in 10 mM Tris-HCl (pH 7.5)/150 mM NaCl/0.1% Tween (TBST), the membrane was incubated with rabbit anti-human *CTSD* antibody (Dako, Glostrup, Denmark, 1 : 500) overnight at 4°C. Immunoreactive bands were visualized by enhanced chemiluminescence after incubation with goat anti-rabbit IgG coupled to horseradish peroxidase (Bio-Rad, Hercules, CA, USA).

### CTSD activity

*CTSD* activity of transfected BHK cell extracts was measured using the recently developed *CTSD* activity assay using 6-[(7-amino-4-methylcoumarin-3-acetyl)amino]hexoic acid (AMCA)-haemoglobin as a substrate (Partanen *et al.*, 2003). Shortly, 20 µl of cell extracts were incubated with 20 µl of the substrate solution (0.1 µg/µl AMCA-Hb/0.4 µg/µl Hb/25 mM formic acid buffer, pH 3.7/50 µM leupeptin) for 24 h at 37°C. The reaction was terminated by addition of 10 µl of 50% trichloroacetic acid. After incubation for 30 min on ice the samples were centrifuged and the supernatants were neutralized with 1 M Tris-HCl (pH 9.0). The fluorescence was measured on a microtitre plate using 365 nm (5 nm slit) for excitation and 460 nm (10 nm slit) for emission with a Varian CARY Eclipse Fluorescence Spectrophotometer (Varian Australia, Mulgrave, Victoria, Australia).

### Immunohistochemistry

The autopsy tissue samples from Patients 1, 2 and 4 were fixed in 4% neutral buffered formaldehyde and subsequently processed and embedded in paraffin. Four-micrometre paraffin sections were immunohistochemically stained for glial fibrillary acidic protein (GFAP) (rabbit anti-GFAP, Dako, Glostrup, Denmark; 1 : 10 000) and CD68 (mouse anti-CD68, clone PG-M1, Dako, Glostrup,

Denmark; 1 : 800), sphingolipid activator protein D (SAP D; antiserum is a kind gift of Prof. Konrad Sandhoff, University of Bonn, Germany; 1 : 300), subunit c of mitochondrial ATP synthase (antiserum is a kind gift of Dr David N. Palmer, Lincoln University, New Zealand; 1 : 600), as well as for *CTSD* (rabbit anti-*CTSD*, Dako, Glostrup, Denmark; 1 : 400). Sections were dewaxed in xylene, pre-treated either with 0.5% trypsin at 37°C for 40 min (GFAP antiserum) or with 4% (w/v) pepsin in 1% (v/v) HCl at 37°C for 20 min (all other antisera), and endogenous peroxidase activity was blocked by incubating the sections in methanol containing 1.6% hydrogen peroxide at RT for 30 min. Sections were blocked and stained for each antigen using an appropriate Vectastain Elite kit (Vector Laboratories, Peterborough, UK), and immunoreactivity was visualized using 3-amino-9-ethylcarbazole and hydrogen peroxide and counterstained with haematoxylin.

## Results

### Clinical findings

The clinical and neuropathological findings in Patients 1–3 in family A and Patient 4 in family B were compatible with the diagnosis of congenital NCL, and the findings in Patients 1 and 4 have been reported previously (Humphreys *et al.*, 1985; Garborg *et al.*, 1987). Within family A, ultrasound examinations of all three affected fetuses demonstrated deceleration of head growth in the last trimester. Delivery at term was followed by intractable seizures, spasticity and apnoea in all patients. In Patient 3, the jerky foetal movements reported by the mother before delivery were recorded by an ultrasound examination and interpreted as myoclonic seizures. All affected infants were microcephalic with overriding sutures and obliterated fontanels. Low-set ears were noted in Patients 1 and 2, while Patient 3 had a low-set ear on the left side and a rudimentary external ear on the right side. In addition, Patient 2 had a claw hand, and Patient 3 had a broad nasal bridge and a receding forehead. Patients 1–3 died at 10, 1 and 4 days of age, respectively. Brain weights of Patients 1 and 2 were 146 and 130 g. Family A also has four unaffected children, of whom two boys have a hearing deficit. In family B, Patient 4 was born after a normal pregnancy and showed post-natal apnoea with cyanosis progressing to respiratory failure and death within 29 hours after birth. Brain weight was 75 g. Interestingly, this patient also exhibited a broad nasal bridge and low-set ears (Humphreys *et al.*, 1985).

### Identification of the mutation in the *CTSD* gene

Previously, we identified an active-site mutation in the ovine *CTSD* gene as a cause of congenital NCL in sheep (Tynnelä *et al.*, 2000). Owing to the close resemblance of the neuropathological findings between the human and ovine congenital NCL, we screened the *CTSD* gene for mutations in a patient with congenital NCL. In the genomic DNA isolated from Patient 3, we identified a nucleotide duplication, c.764dupA, in exon 6 of the *CTSD* gene in a homozygous

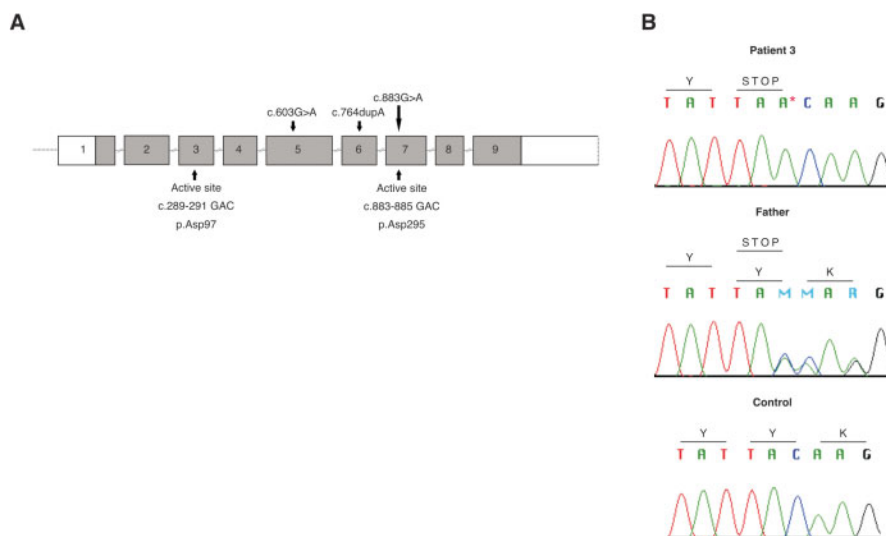

**Fig. 1** Human *CTSD* gene and the *c.764dupA* mutation in congenital NCL. **(A)** *CTSD* genomic structure, positions of NCL-associated mutations and active site encoding nucleotides. *CTSD* is encoded by nine exons (boxes 1–9) of which the coding regions are shown in grey and untranslated regions in white. Nucleotide changes associated with diseases are indicated by arrows above the gene: *c.764dupA* is the novel human mutation; *c.603 G→A* and *c.883G→A* correspond to the canine and ovine mutations in the human cDNA sequence. Nucleotides (*c.289-291* and *c.883-885*) encoding the active site aspartic acids (*p.Asp97* and *p.Asp295*) of the *CTSD* enzyme are indicated by arrows below the gene. **(B)** Sequence chromatograms showing the *c.764dupA* mutation in homozygous form in Patient 3 and in heterozygous form in his father with a respective control sequence (all in forward orientation). The duplicated base in the patient chromatogram is indicated by an asterisk (\*). In the chromatogram of the heterozygous father the sequences from both the mutant and normal alleles can be seen as an overlay of two sequences differing by one nucleotide distal to the duplication. M represents an overlay of adenine (A) and cytosine (C) and R an overlay of adenine and guanine (G).

form (Fig. 1A and B). The father of the patient was a heterozygous carrier of the mutation (Fig. 1B), but no DNA was available from the mother, who is his first cousin. The duplication creates a premature stop codon (TAC→TAAC) at position 255 (*p.Tyr255X*), predicting a truncation of the protein by 158 amino acids. The mutation was not found in any of the 550 control chromosomes. An additional nucleotide change, *c.845G→A*, in exon 7, distal to the stop codon created by the duplication, was also detected in Patient 3 in homozygous form and in his father in heterozygous form (data not shown). If translated the nucleotide change would result in an amino acid substitution of glycine to arginine at position 282 (*p.Gly282Arg*).

### Transient expression of the *c.764dupA* mutant *CTSD* in BHK cells

In order to monitor the effect of the *c.764dupA* mutation in *CTSD* at protein level, we transiently expressed the mutant and the wild-type human *CTSD* in BHK cells. As a control, we used a human *CTSD* cDNA construct with *c.883G→A* mutation, corresponding to an enzymatically inactive mutant *CTSD* described earlier in congenital ovine NCL (Tyynelä *et al.*, 2000; Partanen *et al.*, 2003). When expressed in BHK cells, the *c.764dupA* mutant *CTSD* was enzymatically inactive in cell lysates and showed activity values similar to non-transfected controls and those with the inactive *c.883G→A* mutant (Fig. 2A). In contrast, expression of the wild-type human *CTSD* in BHK cells resulted in 4-fold activity

compared with non-transfected cells (Fig. 2A). The production of the mutant and wild-type proteins in BHK cells was confirmed by western blotting, and their expression levels were found to be roughly equal (Fig. 2B).

As many other lysosomal enzymes, human *CTSD* is produced as a preproenzyme, which undergoes several proteolytic processing steps, first resulting in a single-chain active form, and finally in the mature enzyme composed of two polypeptide chains (Rawlings and Barrett, 1995). When transiently expressed in BHK cells, the wild-type human *CTSD* showed two protein bands on western blots corresponding to the single-chain active polypeptide band at 43 kDa and the mature form of the enzyme at 31 kDa (Fig. 2B). In contrast, the *c.764dupA* mutant *CTSD* appeared as a single band with a molecular weight of ~27 kDa, in agreement with the calculated size of the prematurely truncated protein (Fig. 2B). As a control, we followed the production and processing of the inactive *c.883G→A* mutant in BHK cells: the mutant *c.883G→A* protein was normally processed, producing two protein bands with slightly faster mobility than those in the wild-type (Fig. 2B), as reported before (Partanen *et al.*, 2003).

### Neuropathological findings and absence of *CTSD* immunostaining in the brains of patients with congenital NCL

The neuropathological changes in the brains of Patients 1 and 2 (family A) and Patient 4 (family B) were extremely severe



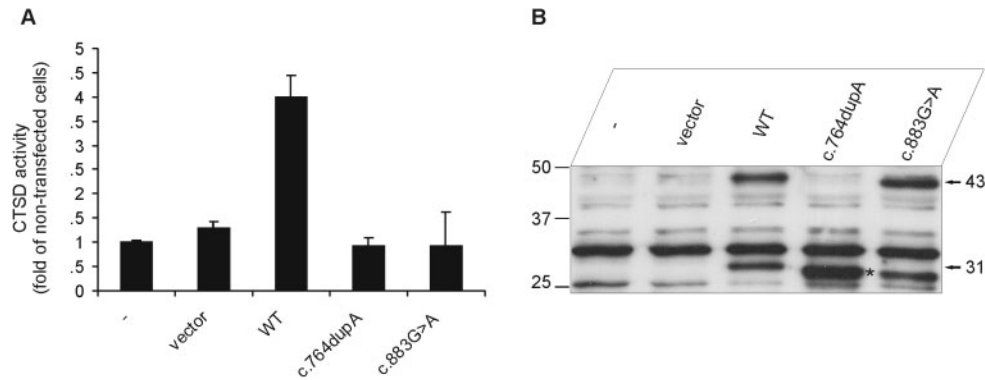

**Fig. 2** Activity and processing of the c.764dupA mutant CTSD. **(A)** CTSD enzyme activity of BHK cells transfected with pcDNA 3.1(+)-vector, human wild-type and mutant CTSD constructs. The activity values are represented as a fold of non-transfected (–) BHK cells, which possess endogenous activity considered as a background. The c.764dupA mutant CTSD (c.764dupA) is enzymatically inactive, while the wild-type (WT) protein shows 4-fold activity compared with non-transfected (–) and vector-transfected (vector) cells. The c.883G→A mutant CTSD (c.883G→A) is known to be enzymatically inactive, and is used as a negative control in this experiment. The values are means  $\pm$  SD of three independent experiments carried out in duplicate. **(B)** Western blot analysis of CTSD enzyme in BHK cells transiently expressing the human wild-type and mutant CTSD compared with non-transfected and pcDNA 3.1(+)-vector-transfected samples. In cells transfected with the wild-type (WT) CTSD, the single-chain (43 kDa) and mature (31 kDa) forms of CTSD are visualized (indicated by arrows on the right side). In marked contrast, the cells transfected with the c.764dupA mutant CTSD (c.764dupA) produce a truncated protein with an apparent molecular weight of 27 kDa (indicated by an asterisk, \*). The previously characterized c.883G→A mutant CTSD (c.883G→A) is used as a control, and shows the single-chain and mature forms of CTSD, with slightly higher mobilities than the wild-type enzyme, as expected. The polyclonal CTSD antiserum also recognizes an additional protein band (~33 kDa) in all cell extracts, including the non-transfected (–) and vector-transfected (vector) cells, and this protein is likely to be endogenous for BHK cells. Molecular weights of markers are indicated on the left (kDa).

and similar. In all cases, the normal architecture of the cerebral and cerebellar cortex was abolished, showing extreme neuronal loss and glial activation, and the white matter was almost devoid of axons and myelin, as previously reported for Patients 1 (Garborg *et al.*, 1987) and 4 (Humphreys *et al.*, 1985). Hypertrophic astrocytes were abundant throughout the brain tissue, particularly in the white matter, and often contained a dense core strongly immunoreactive for GFAP (Fig. 3A–C). Microglial activation was most pronounced within the deeper layers of the cortical grey matter, as shown by CD68 staining (Fig. 3D–F). Storage deposits in all types of cells stained intensely positive for sphingolipid activator protein D (Fig. 4A), but not for subunit c of the mitochondrial ATP synthase (Fig. 4B), which is the main storage component in most forms of the NCLs, including Finnish variant late-infantile NCL (CLN5; Fig. 4C). These findings closely resemble the findings in ovine congenital NCL and human infantile NCL.

CTSD staining was practically absent in tissues of patients with congenital NCL, where neurons and microglial cells were devoid of any staining (Fig. 5A). Sometimes, however, the hypertrophic astrocytes showed a pale, diffuse and probably unspecific positive staining for CTSD in patient tissue (Fig. 5B). In marked contrast, CTSD antiserum produced a typical lysosomal punctate staining pattern in normal neurons (Fig. 5C). As an additional affected control, we stained brain tissue from a CLN5 patient with CTSD antiserum, and found strong immunoreactivity for CTSD within the storage neurons (Fig. 5D).

## Discussion

### A truncating CTSD gene mutation underlies human congenital NCL

In the present work, we provide the first molecular explanation for human congenital NCL by identification of a novel homozygous nucleotide change, c.764dupA, in the CTSD gene in a patient with congenital NCL. As expected, we also identified the same molecular change in heterozygous form in the healthy father. The mutation is likely to be disease-causing, as it creates a premature stop codon in the CTSD polypeptide. This mutation was observed in a homozygous form in Patient 3 and in a heterozygous form in his father, while it was absent in controls. Although there were four affected infants from two families, DNA was available for molecular studies in only one affected individual in family A. Despite multiple efforts, we were unable to extract good-quality DNA from the paraffin-embedded tissues from the other affected individuals in order to confirm the presence of the c.764dupA mutation in the siblings of Patient 3 and to determine the underlying mutation(s) in Patient 4. However, on the basis of the immunohistochemical findings it is reasonable to suggest that a deficiency in CTSD caused congenital NCL in all these patients.

CTSD (EC 3.4.23.5) is a lysosomal aspartic protease that belongs to the pepsin family (Press *et al.*, 1960; Rawlings and Barrett, 1995). The mature form of human CTSD is composed of two polypeptides encoded by the CTSD gene, interlinked by disulphide bridges (Metcalf and Fusek, 1993). Both of these polypeptide chains contain one aspartic acid

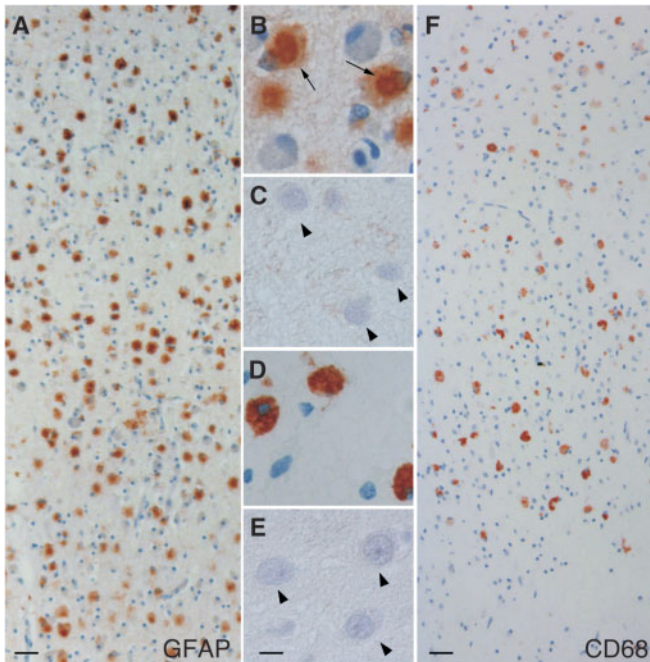

**Fig. 3** Immunohistochemical staining of paraffin-embedded brain specimens from patients with congenital NCL indicates marked glial activation (**A–B**). Immunohistochemical staining of tissue samples using anti-GFAP antibodies reveals a number of GFAP-positive astrocytes throughout the cerebral cortex in samples from patients with congenital NCL. The hypertrophic astrocytes (indicated by arrows) often contain a dense core, which is intensely positive for GFAP. (**C**) In the deeper layers of the normal cerebral cortex, only slight punctate staining of the astrocytic processes between the neurons (indicated by arrowheads) was observed. (**D** and **F**) Immunohistochemical staining using anti-CD68 antiserum indicates that activated microglial cells were particularly abundant in the deep layers of the cerebral cortex. (**E**) In the normal cerebral cortex, healthy-looking neurons (indicated by arrowheads) were numerous but CD68-positive microglial cells were not observed. Scale bars, 40  $\mu\text{m}$  in **A** and **F**, 10  $\mu\text{m}$  in **E**.

residue that is essential for the enzymatic activity of the protein (Faust *et al.*, 1985; Rawlings and Barrett, 1995). The novel congenital NCL mutation, c.764dupA, creates a premature stop codon at tyrosine 255 (p.Tyr255X) in CTSD, resulting in a truncation of the polypeptide by 158 amino acids, and in a deletion of the active site aspartic acid residue at position 295. In addition to the duplication, we found a nucleotide change c.845G→A (p.Gly282Arg) in homozygous form in the patient and in heterozygous form in his father. This nucleotide change is not likely to be disease-causing because it is located distal to the c.764dupA, which creates a premature stop codon in the CTSD gene. Moreover, the affected amino acid (Gly282) is not conserved among species, and, for example, sheep, mouse and man have different amino acids in that position.

The observed mutation resulting in a premature stop codon in the CTSD gene leads to production of an abnormally short mRNA, which may be degraded through the

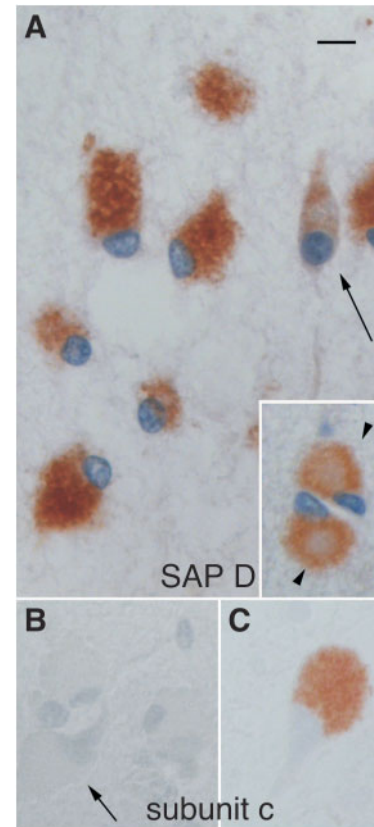

**Fig. 4** Immunohistochemical staining of paraffin-embedded brain specimens from patients with congenital NCL reveals accumulation of sphingolipid activator protein D. (**A**) Immunohistochemical staining of tissue samples from patients with congenital NCL using sphingolipid activator protein D antiserum shows that the storage deposits within most cells, particularly in cells of glial origin, are strongly positive for sphingolipid activator protein D (SAP D). The few remaining neurons (indicated by an arrow) are variably positive for sphingolipid activator protein D, and the hypertrophic astrocytes (indicated by arrowheads) often show a core devoid of any staining (inset). (**B**) The storage material within the remaining neurons (indicated by an arrow) and the surrounding glial cells in samples from patients with congenital NCL is negative for subunit c of mitochondrial ATP synthase (subunit c), (**C**) while the storage material in Finnish variant late-infantile NCL (CLN5) is strongly positive for subunit c. All panels have the same magnification; scale bar, 10  $\mu\text{m}$ , shown in **A**.

nonsense-mediated decay system (Hentze and Kulozik, 1999). Alternatively, post-translational quality control may result in an early degradation of the truncated protein. Early degradation of the mutant CTSD either at mRNA or protein level is likely to occur *in vivo*, because of the absence of CTSD staining in paraffin-embedded brain tissue specimens of Patients 1, 2 and 4. However, when the c.764dupA mutant CTSD was transiently expressed in BHK cells, a truncated form of CTSD was produced and appeared stable, but was enzymatically inactive, as expected owing to the absence of the active site aspartic acid residue. This may be due to the differences between the *in vivo* situation and the heterologous expression system, where the protein is produced in excess and the post-translational processing may occur differently.

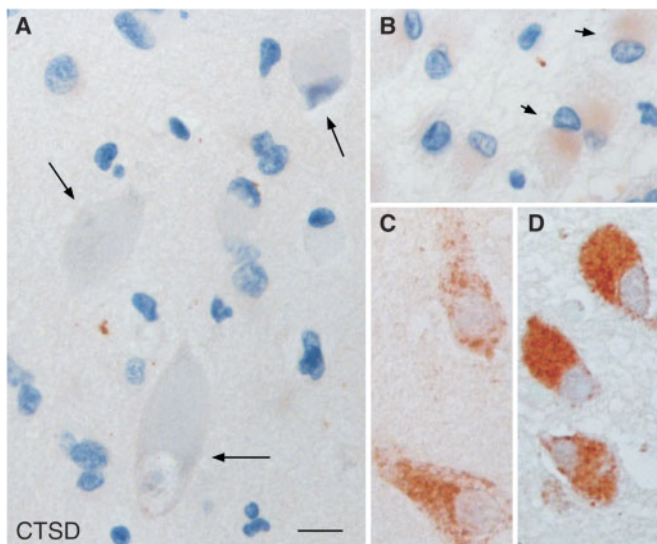

**Fig. 5** CTSD staining is absent in paraffin-embedded brain specimens from patients with congenital NCL. **(A)** Immunohistological staining with a polyclonal CTSD antiserum reveals complete absence of CTSD in neurons (indicated by long arrows) and most other cells in samples from patients with congenital NCL. **(B)** Sometimes the hypertrophic astrocytes (indicated by short arrows), particularly within the white matter, stain diffusely for CTSD in the patient samples. **(C)** Normal neurons show a punctate staining for CTSD, **(D)** while the storage neurons in a patient with Finnish variant late-infantile NCL (CLN5) are strongly positive for CTSD **(D)**. All panels have the same magnification; scale bar, 10  $\mu$ m, shown in **A**.

### CTSD deficiency in humans defines a distinct clinical NCL phenotype

The clinical findings in all four patients affected with congenital NCL were nearly identical. The extreme clinical phenotype, including severe post-natal central apnoea, seizures and death after birth is compatible with complete inactivation of the CTSD protein. The complete lack of the CTSD enzyme activity also leads to an early-onset and progressive neurodegenerative NCL disease in mice and sheep (Koike *et al.*, 2000; Tyynelä *et al.*, 2000), while the missense mutations observed in American bulldogs result in a partial inactivation of the CTSD, and, accordingly, to a late-onset form of NCL (Awano *et al.*, 2005). In addition, all patients with congenital NCL exhibited nearly identical neuropathological changes, characterized by complete disorganization of the neurons in the cerebral cortex, loss of Purkinje cells and inner granule cells in the cerebellum, as well as extreme glial activation (the present observations; Humphreys *et al.*, 1985; Garborg *et al.*, 1987). In all patients studied, the storage deposits were positive for sphingolipid activator protein D but not for subunit c of the mitochondrial ATP synthase, resembling the findings in human infantile NCL, caused by mutations in the palmitoyl protein-thioesterase 1 gene (Vesa *et al.*, 1995), and ovine congenital NCL, caused by a mutation in the CTSD gene (Tyynelä *et al.*, 2000). In addition, the storage

material in all these patients showed granular ultrastructure (Humphreys *et al.*, 1985; Garborg *et al.*, 1987), as did yet another previously reported patient with congenital NCL (Barohn *et al.*, 1992), and animal models with CTSD deficiency, including sheep (Tyynelä *et al.*, 2000), American bulldogs (Awano *et al.*, 2005), mice (Koike *et al.*, 2000) and *Drosophila* (Myllykangas *et al.*, 2005).

Currently, there is no effective treatment for any form of NCLs. However, promising results from the adeno-associated virus-mediated gene therapy in mouse models of NCLs are emerging (Griffey *et al.*, 2005; Passini *et al.*, 2006). Unfortunately, prenatal treatment of congenital NCL seems very difficult, as it would imply strategies for appropriate substances or vectors to pass the placenta and reach the foetal brain early in pregnancy. However, the potential later-onset forms of CTSD deficiency may prove to be better targets for therapeutic trials.

In conclusion, we identified a disease-causing mutation in the CTSD gene of a patient with congenital NCL. On the basis of our present data as well as the nearly identical clinical and/or pathological phenotype of our patients and the other reported cases of congenital NCL, it is reasonable to suggest that CTSD deficiency caused by mutations in the corresponding gene may underlie all cases of congenital NCL. Thus, CTSD deficiency should be considered as a possible diagnosis in microcephalic neonates, who present with seizures at or before birth.

### Acknowledgements

We want to thank Teija-Tuulia Toivonen, Mairi Kuris, Teija Inkinen and Tuija Järvinen for excellent technical assistance, as well as Dr Anna-Kaisa Anttonen and Dr Nina Aula for helpful advice. Dr Svein Erik Tangsrud, Ullevål University Hospital, Oslo, Norway, is thanked for his support, and Professors Jennian Geddes, Royal London Hospital, UK; Kari Skullerud, National Hospital of Norway, Oslo, Norway; and Dr Anders Paetau, Helsinki University Central Hospital, Helsinki, Finland for providing patient and control material. This study was financially supported by the Academy of Finland (J.T., A.E.L.), European Union (J.T.) and the Folkhälsan Research Foundation (A.E.L.). E.S. is a fellow of the Helsinki Biomedical Graduate School, and S.P. of the Finnish Graduate School of Neuroscience.

### References

- Awano T, Katz ML, O'Brien DP, Taylor JF, Evans J, Khan S, *et al.* A mutation in the cathepsin D gene (CTSD) in American bulldogs with neuronal ceroid lipofuscinosis. *Mol Genet Metab* 2006; 87: 341–8.
- Barohn RJ, Dowd DC, Kagan-Hallet KS. Congenital ceroid-lipofuscinosis. *Pediatr Neurol* 1992; 8: 54–9.
- Brown NJ, Corner BD, Dodgson MC. A second case in the same family of congenital familial cerebral lipoidosis resembling amaurotic family idiocy. *Arch Dis Child* 1954; 29: 48–54.



- Faust PL, Kornfield S, Chirgwin JM. Cloning and sequence analysis of cDNA for human cathepsin D. *Proc Natl Acad Sci USA* 1985; 82: 4910–4.
- Garborg I, Torvik A, Hals J, Tangsrud SE, Lindemann R. Congenital neuronal ceroid lipofuscinosis. A case report. *Acta Pathol Microbiol Immunol Scand [A]* 1987; 95: 119–25.
- Griffey M, Macauley SL, Ogilvie JM, Sands MS. AAV2-mediated ocular gene therapy for infantile neuronal ceroid lipofuscinoses. *Mol Ther* 2005; 12: 413–21.
- Haltia M. The neuronal ceroid-lipofuscinoses. *J Neuropathol Exp Neurol* 2003; 62: 1–13.
- Henze MW, Kulozik AE. RNA surveillance and nonsense-mediated decay. *Cell* 1999; 96: 307–10.
- Humphreys S, Lake BD, Scholtz CL. Congenital amaurotic idiocy—a pathological, histochemical, biochemical and ultrastructural study. *Neuropathol Appl Neurobiol* 1985; 11: 475–84.
- Järplid B, Haltia M. An animal model of the infantile type of neuronal ceroid-lipofuscinosis. *J Inherit Metab Dis* 1993; 16: 274–7.
- Kohlschütter A, Lake BD. NCL variants without genetic assignment. In: Goebel HH, Mole SE, Lake BD, editors. *The neuronal ceroid lipofuscinoses (Batten disease)*. Amsterdam: IOS Press; 1999. pp. 125–7.
- Koike M, Nakanishi H, Saftig P, Ezaki J, Isahara K, Ohsawa Y, et al. Cathepsin D deficiency induces lysosomal storage with ceroid lipofuscin in mouse CNS neurons. *J Neurosci* 2000; 15: 6898–906.
- Metcalf P, Fusek M. Two crystal structures for cathepsin D: the lysosomal targeting signal and active site. *EMBO J* 1993; 12: 1293–302.
- Mylykangas L, Tyynelä J, Page-McCaw A, Rubin GM, Haltia MJ, Feany MB. Cathepsin D-deficient *Drosophila* recapitulate the key features of neuronal ceroid lipofuscinoses. *Neurobiol Dis* 2005; 19: 194–9.
- Norman R, Wood N. Congenital form of amaurotic family idiocy. *J Neur Psychiat* 1941; 4: 175–90.
- Partanen S, Storch S, Löffler HG, Hasilik A, Tyynelä J, Bräulke T. A replacement of the active-site aspartic acid residue 293 in mouse cathepsin D affects its intracellular stability, processing and transport in HEK-293 cells. *Biochem J* 2003; 369: 55–62.
- Passini MA, Dodge JC, Bu J, Wendy Y, Zhao Q, Sondhi D, et al. Intracranial delivery of CLN2 reduces brain pathology in a mouse model of classical late infantile neuronal ceroid lipofuscinoses. *J Neurosci* 2006; 26: 1334–42.
- Press EM, Porter RR, Cebra J. The isolation and properties of a proteolytic enzyme, cathepsin D, from bovine spleen. *Biochem* 1960; 74: 501–51.
- Rawlings ND, Barrett A. Families of aspartic peptidases and those of unknown catalytic mechanism. *Methods Enzymol* 1995; 248: 105–20.
- Saftig P, Hetman M, Schmahl W, Weber K, Heine L, Mossmann H, et al. Mice deficient for the lysosomal proteinase cathepsin D exhibit progressive atrophy of the intestinal mucosa and profound destruction of lymphoid cells. *EMBO J* 1995; 1: 3599–608.
- Sandbank U. Congenital amaurotic idiocy. *Path Europ* 1968; 3: 226–9.
- Tyynelä J. Neuronal ceroid-lipofuscinoses. In: Saftig P, editor. *Lysosomes*. Georgetown, TX: Landes Bioscience/Eurekah.com; New York, NY: Springer Science+Business Media, Inc. 2005. pp. 82–99.
- Tyynelä J, Sohar I, Sleat DE, Gin RM, Donnelly RJ, Baumann M, Haltia M, Lobel P. A mutation in the ovine cathepsin D gene causes a congenital lysosomal storage disease with profound neurodegeneration. *EMBO J* 2000; 15: 2786–92.
- Vesa J, Hellsten E, Verkruyse LA, Camp LA, Rapola J, Santavuori P, et al. Mutations in the palmitoyl protein thioesterase gene causing infantile neuronal ceroid lipofuscinosis. *Nature* 1995; 376: 584–7.
